# Supplementary material for: Protein arginine methyltransferase 3-induced metabolic reprogramming is a vulnerable target of pancreatic cancer
Source: Springer Nature journal article supplement (doi:10.1186/s13045-019-0769-7), 2019-07-19

# Supplementary data

Figure S1

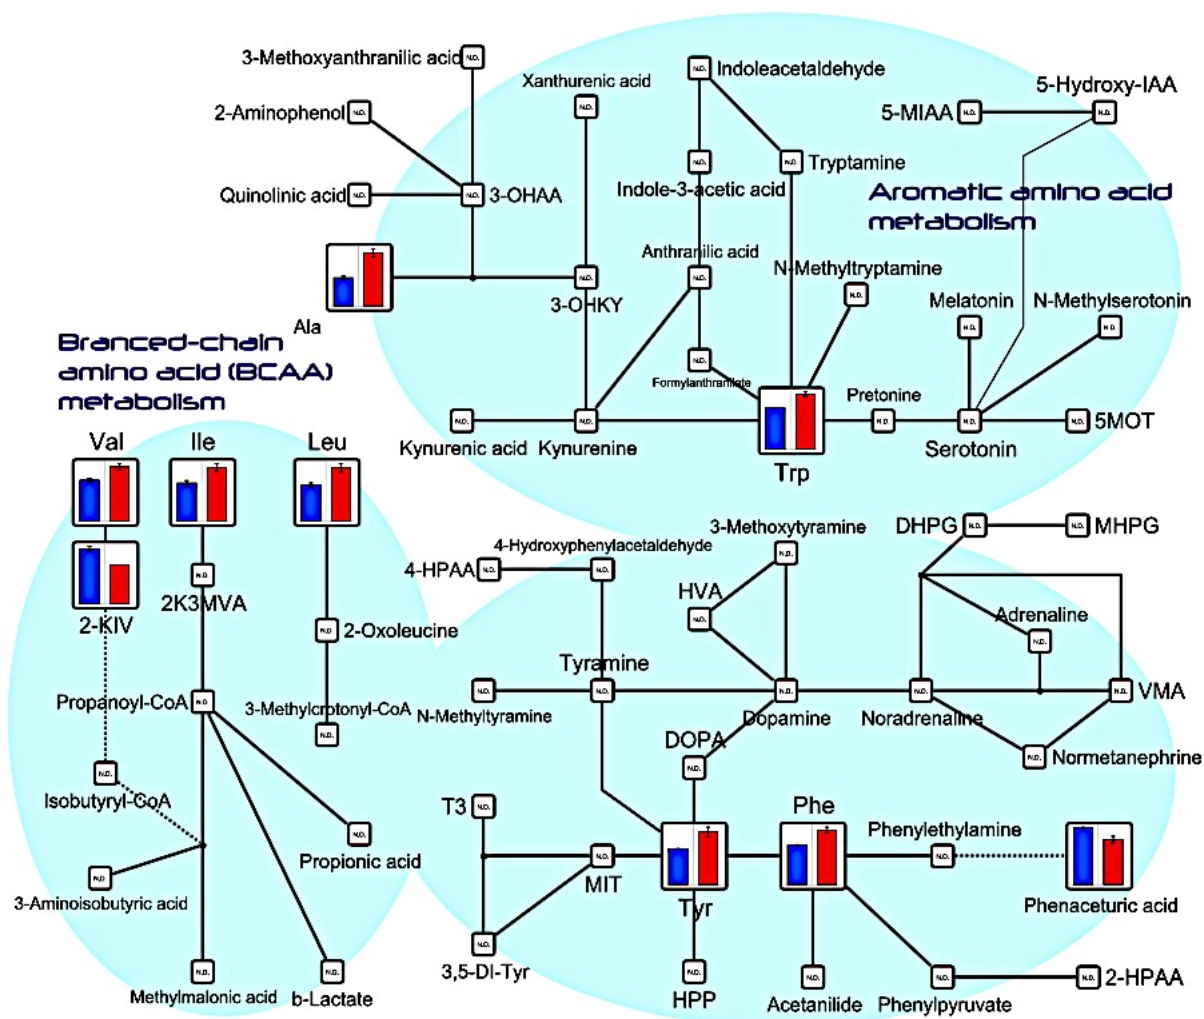

Supplement: MOESM2 [file 16965582]
