# Supplementary material for: Protein arginine methyltransferase 3-induced metabolic reprogramming is a vulnerable target of pancreatic cancer
Source: Springer Nature journal article supplement (doi:10.1186/s13045-019-0769-7), 2019-07-19

# Figure S3

## Nicotinamide metabolism

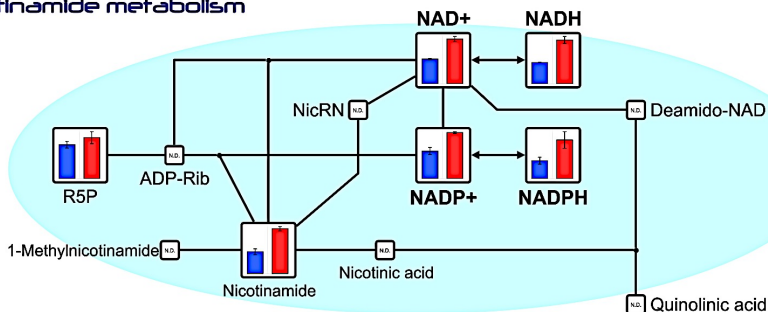

## Riboflavin metabolism

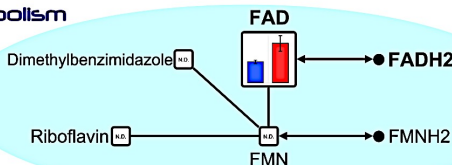

## CoA metabolism

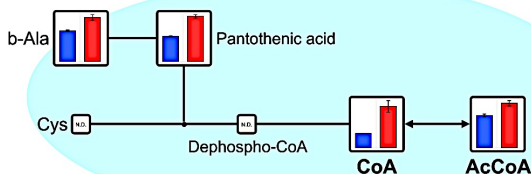

## Folate metabolism

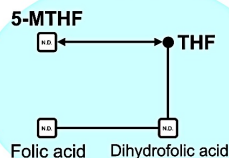

## Vitamin B6 metabolism

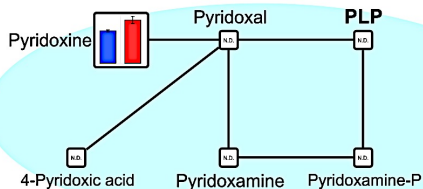

## Biotin & Thiamine metabolism

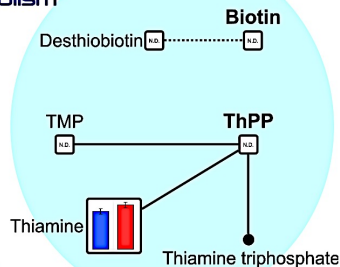

## Vitamin C metabolism

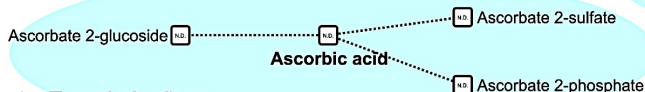

Supplement: MOESM4 [file 16965582]
